# Supplementary material for: Isoquinoline-1,3-dione-derived conjugated polymers for field-effect transistors: synthesis, properties, and the effect of inner aromatic bridges
Source: Royal Society of Chemistry journal article supplement (doi:10.1039/d3py00063j), 2023-01-01
Supplement: d3py00063j1.pdf [file d3py00063j1.pdf]

## Supporting Information

For

# **Isoquinoline-1,3-dione-derived conjugated polymers for field-effect transistors: Synthesis, properties, and the effect of inner aromatic bridges**

Yankai Zhou,<sup>a,c</sup> Qian Che,<sup>a,c</sup> Weifeng Zhang,<sup>\*a</sup> Hao Li,<sup>b</sup> Xuyang Wei,<sup>a,c</sup> Xitong Liu,<sup>a,c</sup>  
Liping Wang,<sup>\*b</sup> and Gui Yu<sup>\*a,c</sup>

<sup>a</sup> Beijing National Laboratory for Molecular Sciences, CAS Research/Education Center for Excellence in Molecular Sciences, Institute of Chemistry, Chinese Academy of Sciences, Beijing 100190, P. R. China

<sup>b</sup> School of Materials Science and Engineering, University of Science and Technology Beijing, Beijing 100083, P. R. China

<sup>c</sup> School of Chemical Sciences, University of Chinese Academy of Sciences, Beijing 100049, P. R. China

## Content

- 1. The GPC measurements**
- 2. The TGA and DSC tests**
- 3. The NMR Spectra of intermediates and polymers**

**MW Averages**  
Mp: 107913      Mn: 90500      Mv: 192938      Mw: 225252  
Mz: 589080      Mz+1: 1108529      PD: 2.4890

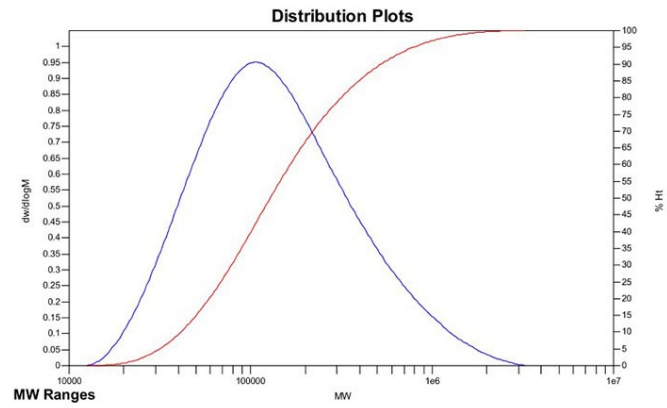

**MW Averages**  
Mp: 150347      Mn: 96905      Mv: 160468      Mw: 174550  
Mz: 290245      Mz+1: 425430      PD: 1.8012

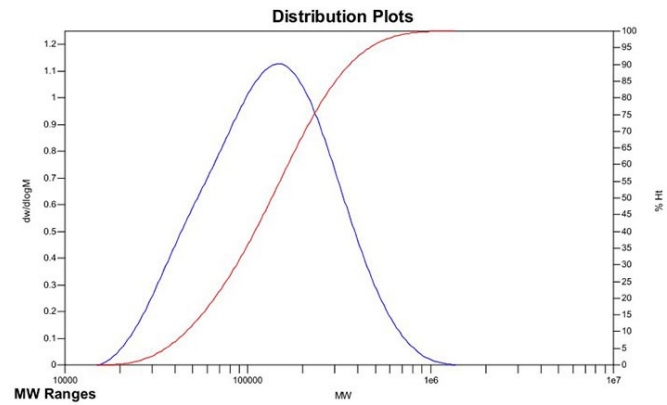

**MW Averages**  
Mp: 116368      Mn: 83801      Mv: 140106      Mw: 153250  
Mz: 265831      Mz+1: 404269      PD: 1.8287

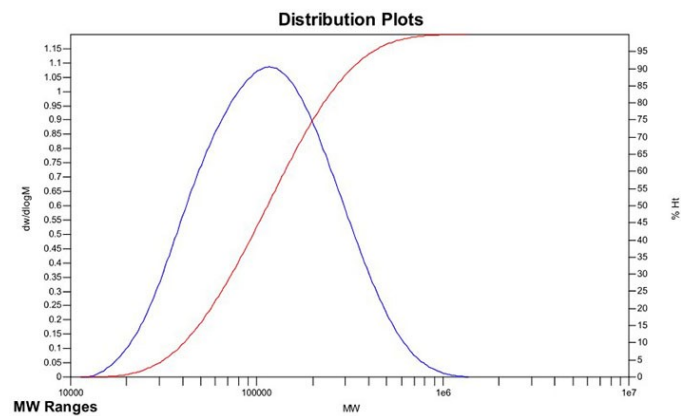

**Figure S1. GPC plots of P1–P3.**

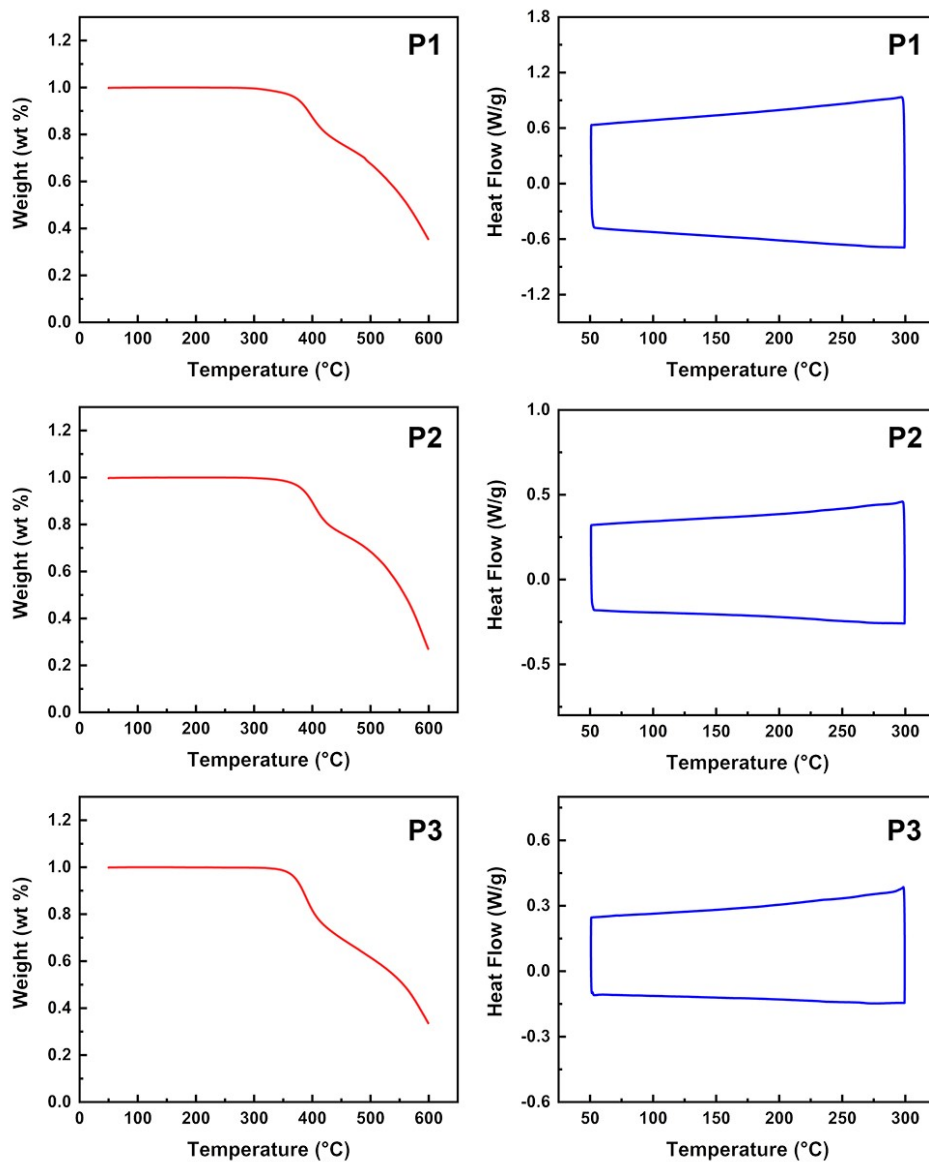

**Figure S2.** TGA traces and DSC curves of **P1–P3**.

### NMR Spectra:

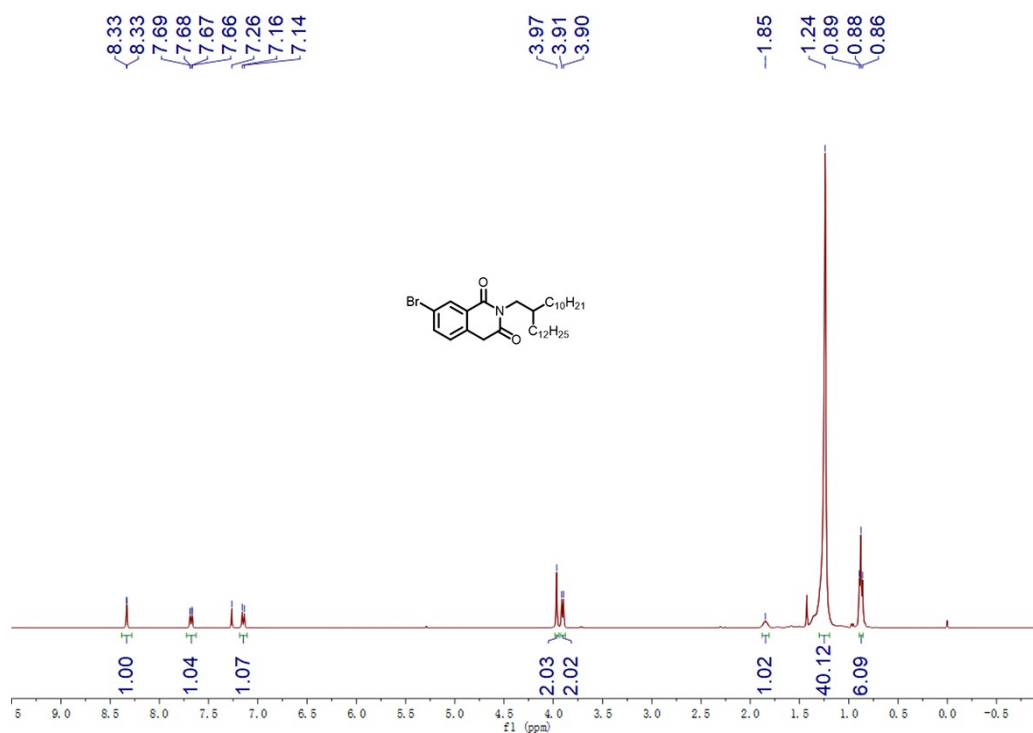

Figure S3. <sup>1</sup>H NMR spectrum of Compound 4.

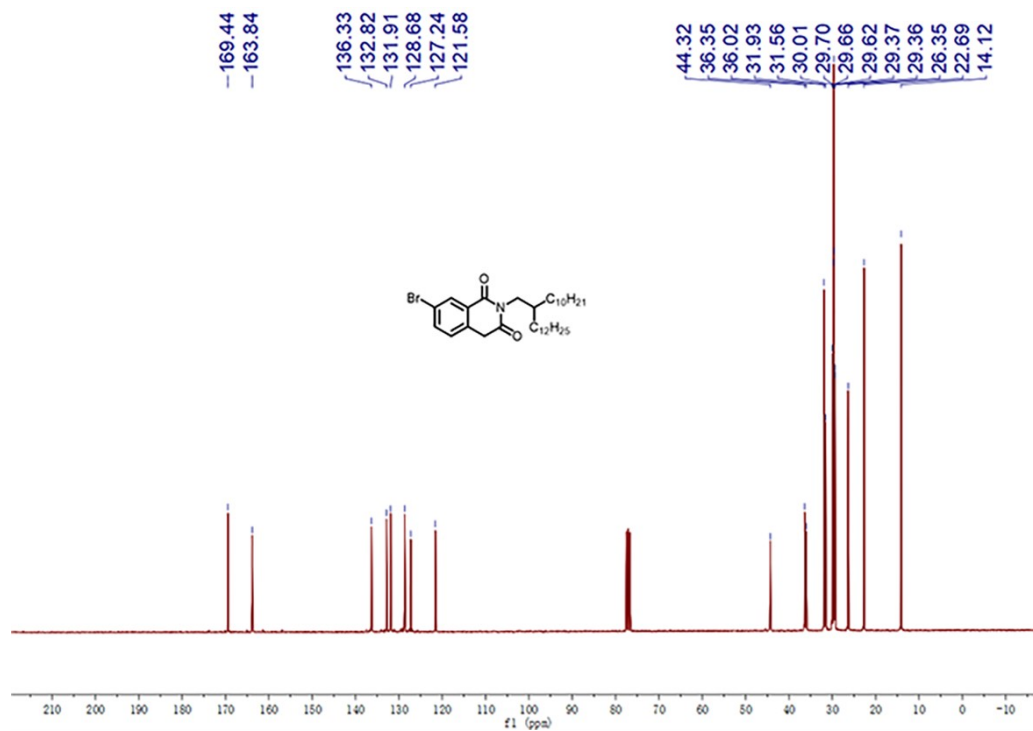

Figure S4. <sup>13</sup>C NMR spectrum of Compound 4.

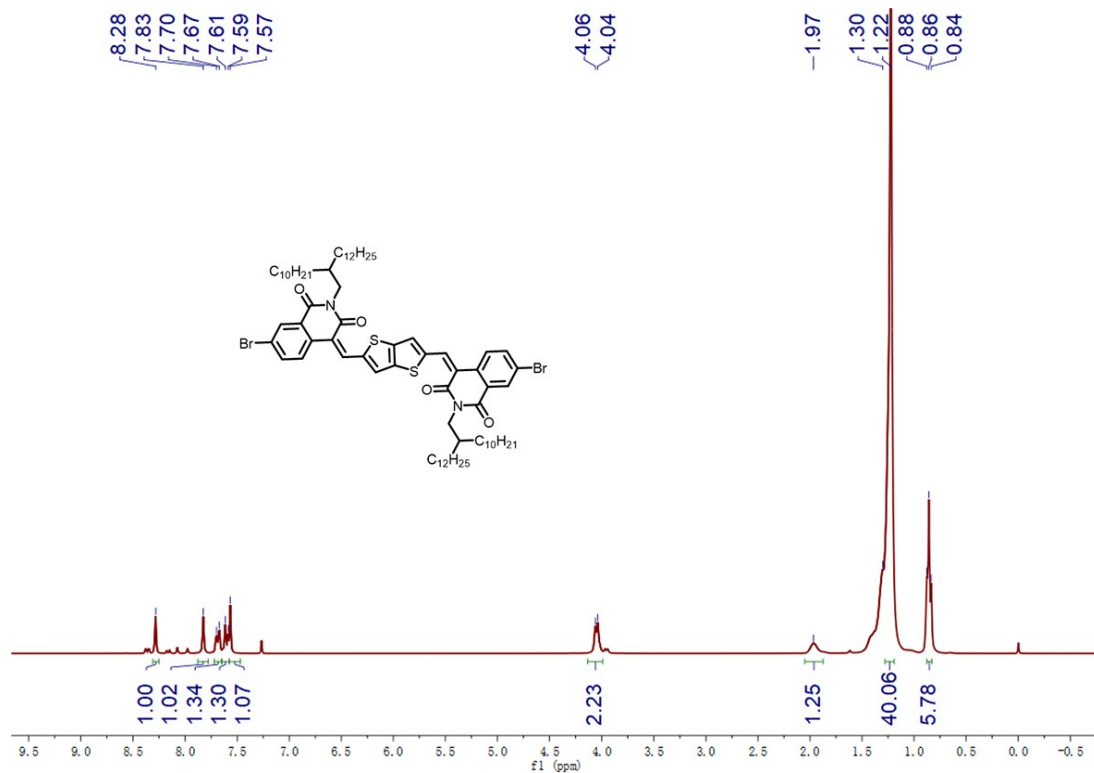

Figure S5. <sup>1</sup>H NMR spectrum of Compound 5a.

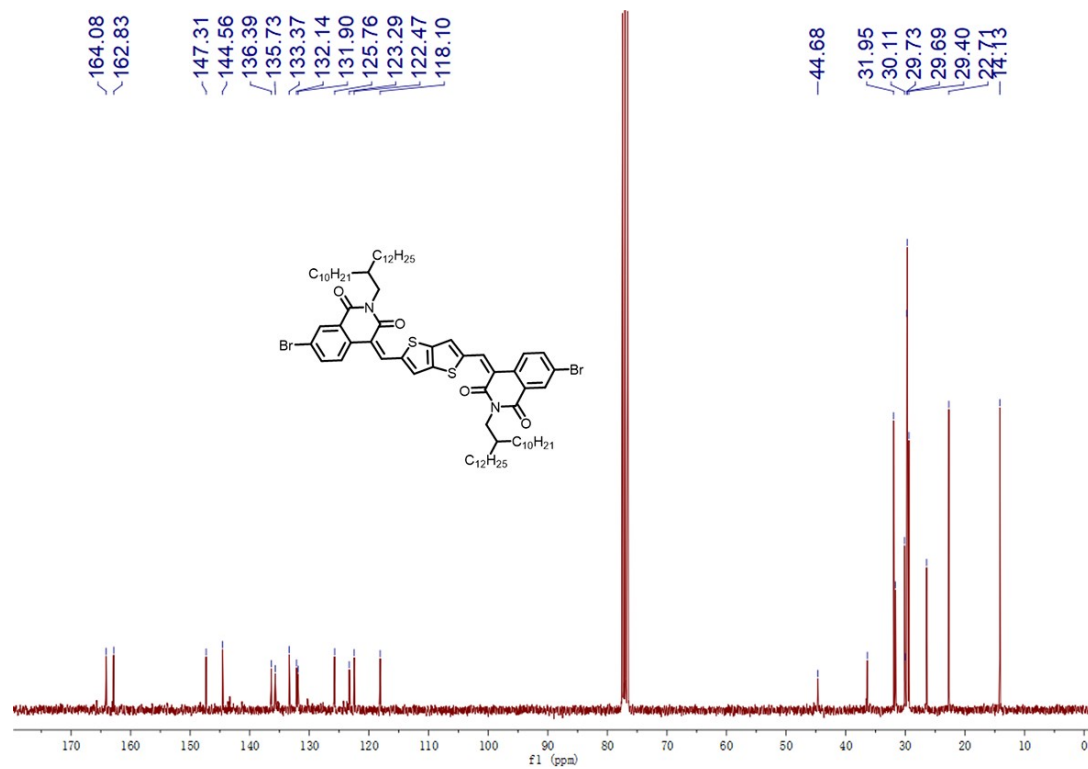

Figure S6. <sup>13</sup>C NMR spectrum of Compound 5a.

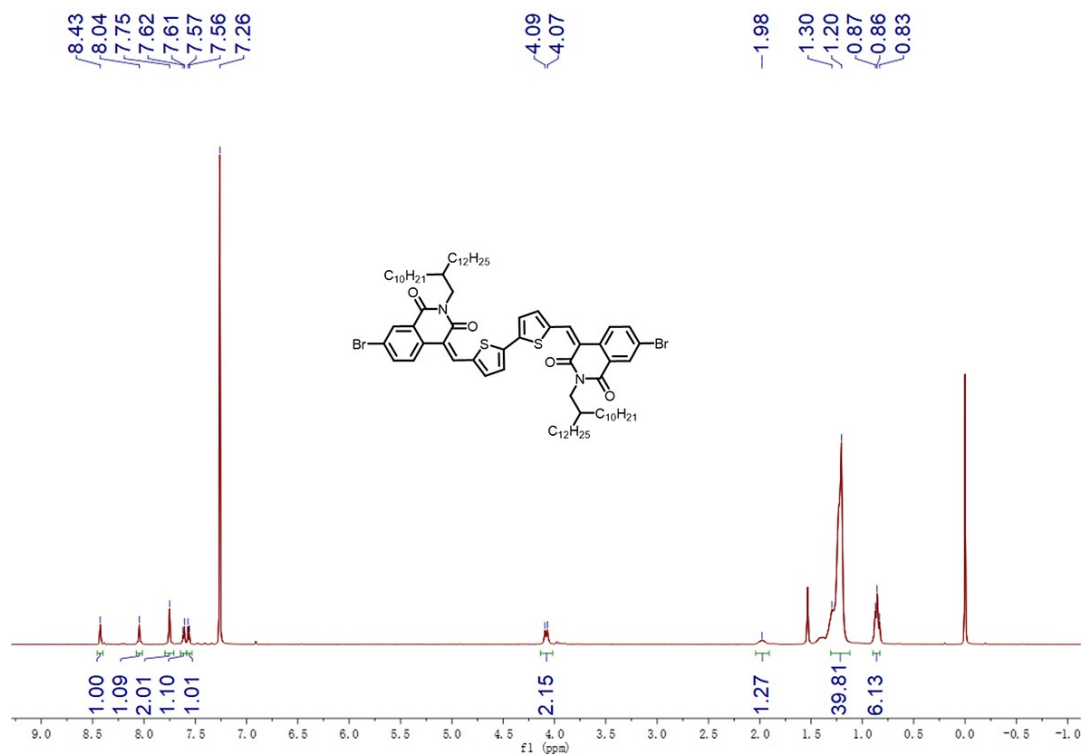

Figure S7. <sup>1</sup>H NMR spectrum of Compound 5b.

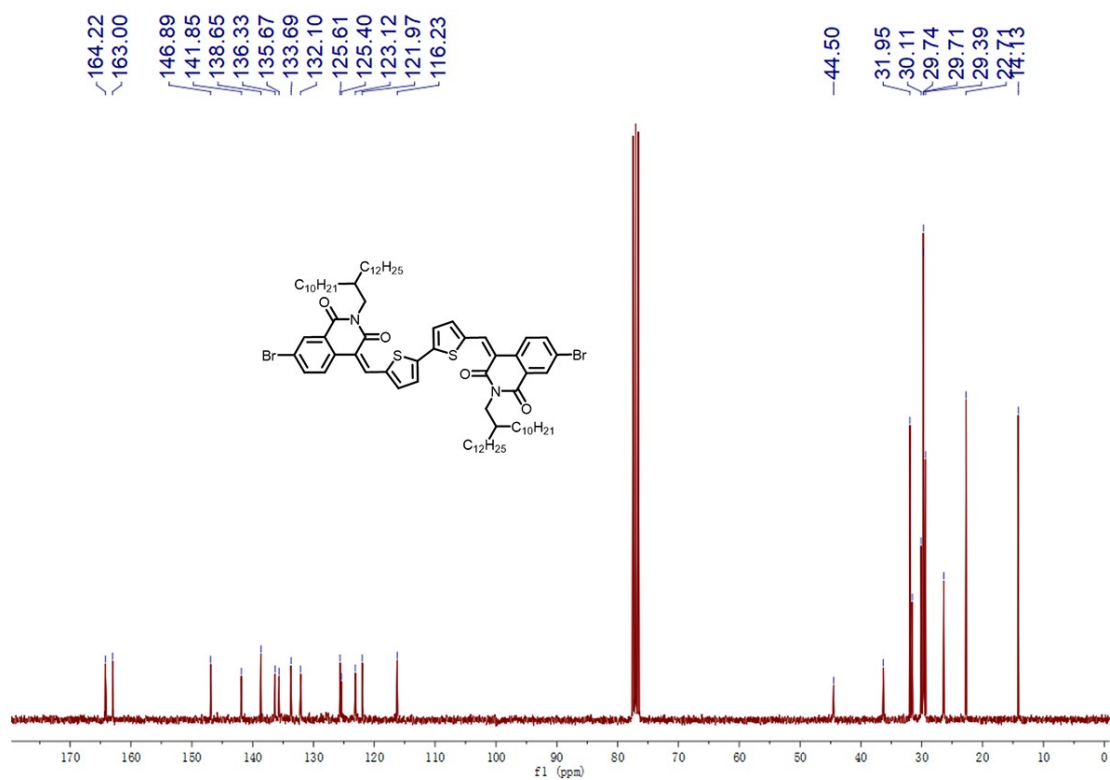

Figure S8. <sup>13</sup>C NMR spectrum of Compound 5b.

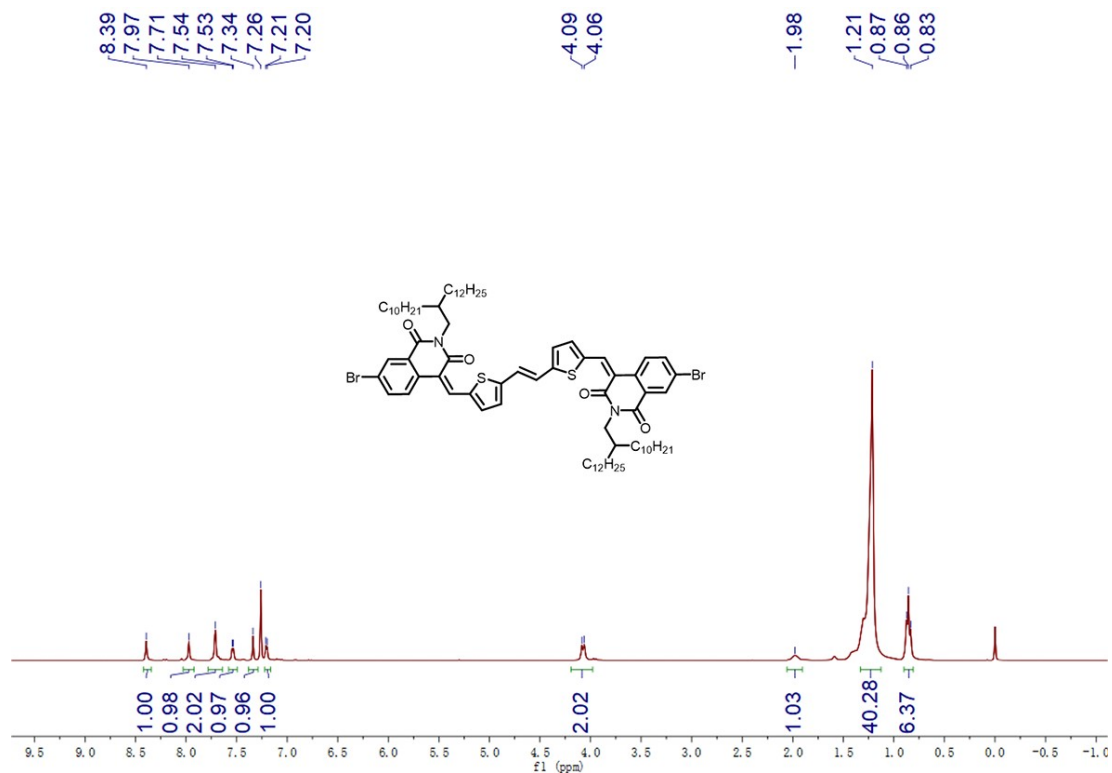

Figure S9. <sup>1</sup>H NMR spectrum of Compound 5c.

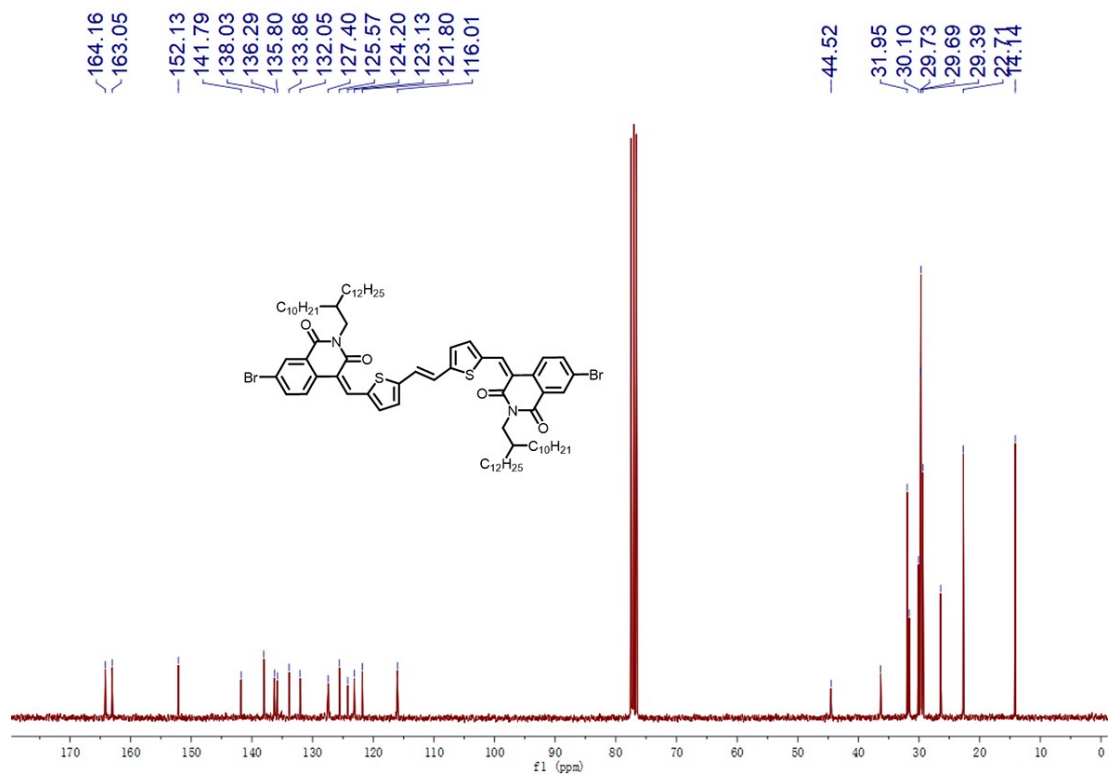

Figure S10. <sup>13</sup>C NMR spectrum of Compound 5c.

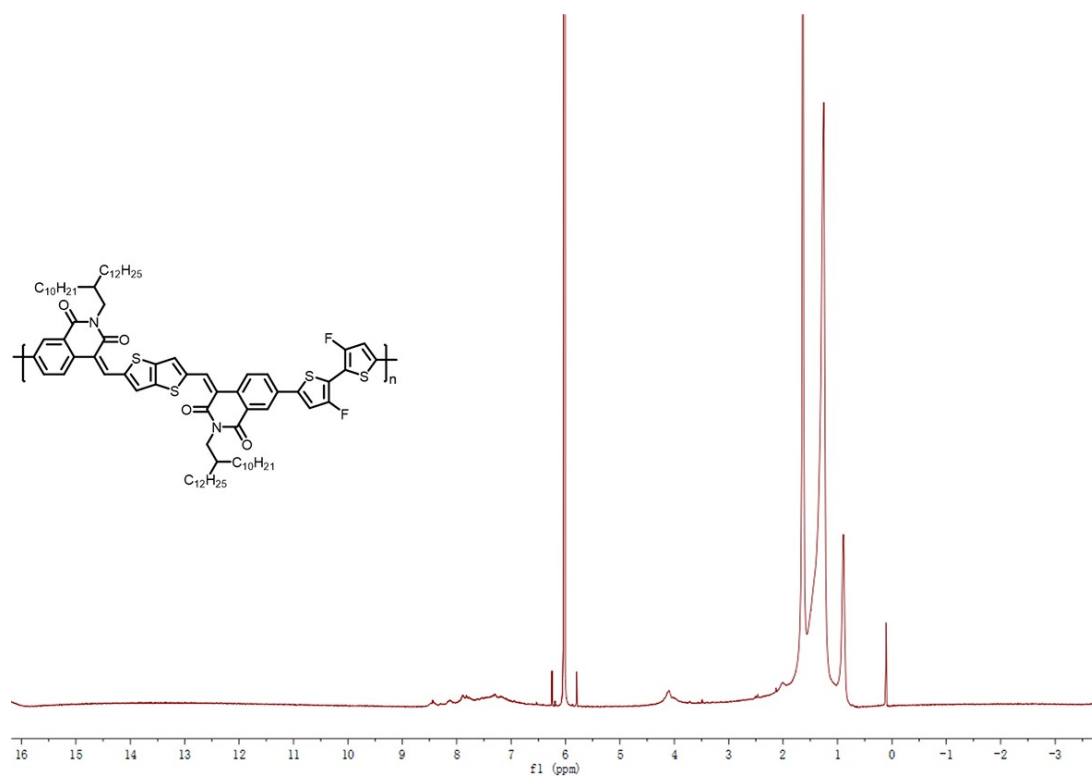

**Figure S11.** <sup>1</sup>H NMR spectrum of **P1**.

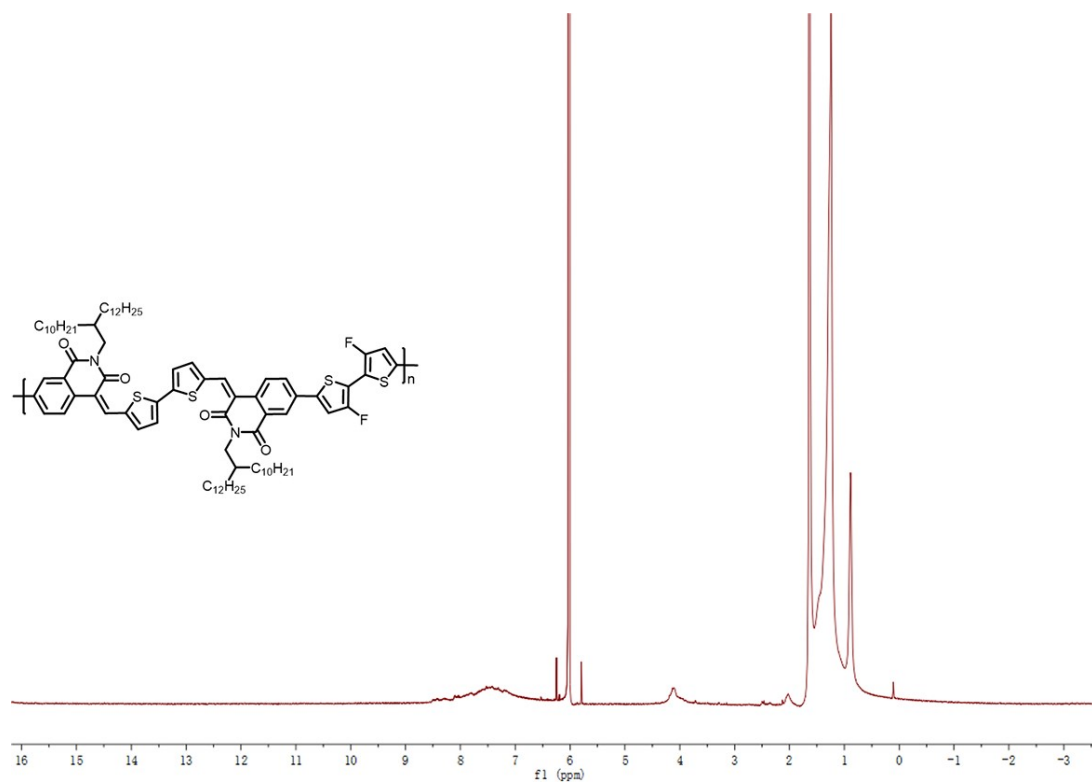

**Figure S12.** <sup>1</sup>H NMR spectrum of **P2**.



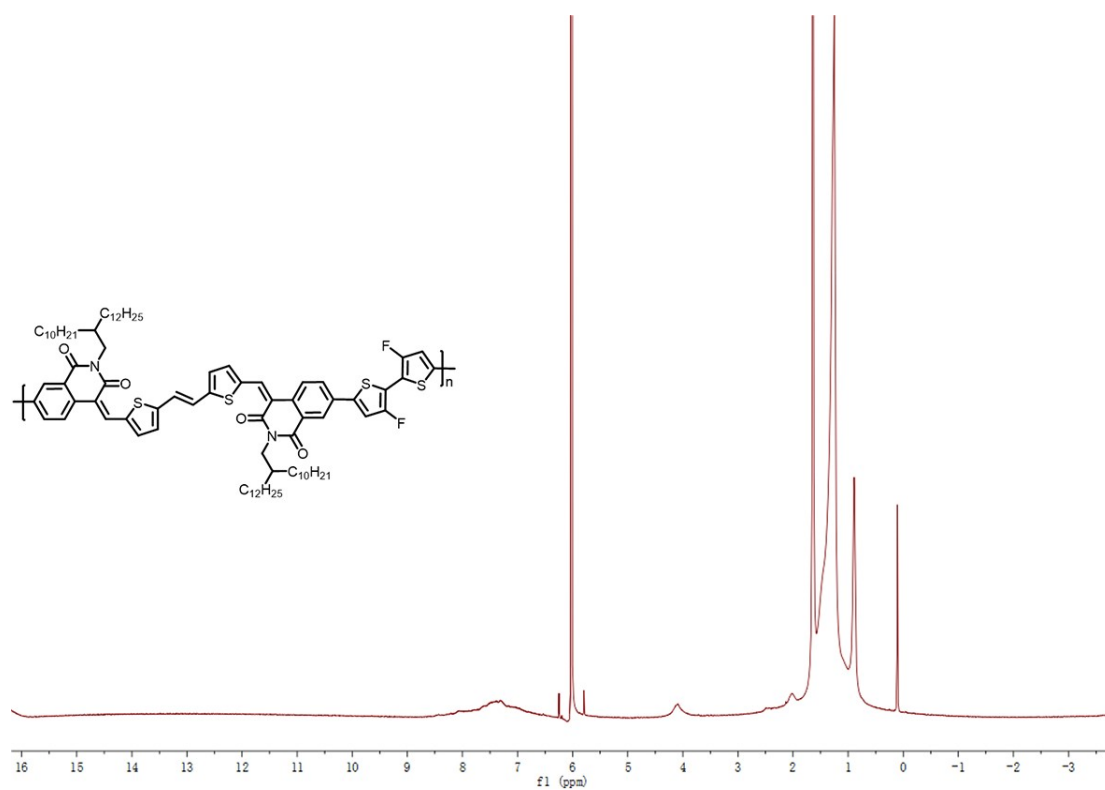

**Figure S13.**  $^1\text{H}$  NMR spectrum of **P3**.
